# Supplementary material
Source: HighWire-hosted journal article supplement (https://bmjopen.bmj.com/content/11/6/e043966)
Supplement: inline-supplementary-material-3 [file inline-supplementary-material-3.pdf]

### Appendix C. Complete list of references for included studies

1. Alvarez Gallego M, Gortazar de Las Casas S, Pascual Miguelanez I, et al. SARS-CoV-2 pandemic on the activity and professionals of a General Surgery and Digestive Surgery Service in a tertiary hospital. *Cir Esp* 2020 doi: 10.1016/j.ciresp.2020.04.001 [published Online First: 2020/04/28]
2. Ammar A, Stock AD, Holland R, et al. Managing a Specialty Service During the COVID-19 Crisis: Lessons From a New York City Health System. *Acad Med* 2020 doi: 10.1097/ACM.0000000000003440 [published Online First: 2020/04/19]
3. Amparore D, Claps F, Cacciamani GE, et al. Impact of the COVID-19 pandemic on urology residency training in Italy. *Minerva Urol Nefrol* 2020 doi: 10.23736/S0393-2249.20.03868-0 [published Online First: 2020/04/08]
4. Ansarin M. Surgical management of head and neck tumours during the SARS-CoV (COVID-19) pandemic. *Acta Otorhinolaryngol Ital* 2020;40(2):87-89. doi: 10.14639/0392-100X-N0783 [published Online First: 2020/04/10]
5. Bashir M, Moughal S. Cardiovascular disease and surgery amid COVID-19 pandemic. *J Vasc Surg* 2020 doi: 10.1016/j.jvs.2020.04.479 [published Online First: 2020/05/04]
6. Ben Abdallah I. Early experience in Paris with the impact of the COVID-19 pandemic on vascular surgery. *J Vasc Surg* 2020 doi: 10.1016/j.jvs.2020.04.467 [published Online First: 2020/04/27]
7. Bernucci C, Brembilla C, Veiceschi P. Effects of the COVID-19 Outbreak in Northern Italy: Perspectives from the Bergamo Neurosurgery Department. *World Neurosurg* 2020;137:465-68 e1. doi: 10.1016/j.wneu.2020.03.179 [published Online First: 2020/04/06]
8. Bettinelli G, Delmastro E, Salvato D, et al. Orthopaedic patient workflow in CoViD-19 pandemic in Italy. *J Orthop* 2020;22:158-59. doi: 10.1016/j.jor.2020.04.006 [published Online First: 2020/05/07]
9. Bolkan HA, Bash-Taqi DA, Samai M, et al. Ebola and indirect effects on health service function in sierra leone. *PLoS Curr* 2014;6 doi: 10.1371/currents.outbreaks.0307d588df619f9c9447f8ead5b72b2d [published Online First: 2015/02/17]
10. Bolkan HA, van Duinen A, Samai M, et al. Admissions and surgery as indicators of hospital functions in Sierra Leone during the west-African Ebola outbreak. *BMC Health Serv Res* 2018;18(1):846. doi: 10.1186/s12913-018-3666-9 [published Online First: 2018/11/11]
11. Bourlon MT, Macias AE, de la Torre A, et al. Organization of a third-level care hospital in Mexico City during the 2009 influenza epidemic. *Arch Med Res* 2009;40(8):681-6. doi: 10.1016/j.arcmed.2009.10.009 [published Online First: 2010/03/23]
12. Bradford IM. Tales from the frontline: the colorectal battle against SARS. *Colorectal Dis* 2004;6(2):121-3. doi: 10.1111/j.1462-8910.2004.00600.x [published Online First: 2004/03/11]
13. Brethauer SA, Poulouse BK, Needleman BJ, et al. Redesigning a Department of Surgery during the COVID-19 Pandemic. *J Gastrointest Surg* 2020 doi: 10.1007/s11605-020-04608-4 [published Online First: 2020/04/30]
14. Brown TS, Bedard NA, Rojas EO, et al. The Effect of the COVID-19 Pandemic on Electively Scheduled Hip and Knee Arthroplasty Patients in the United States. *J Arthroplasty* 2020 doi: 10.1016/j.arth.2020.04.052 [published Online First: 2020/05/08]

15. Buckstein M, Skubish S, Smith K, et al. Experiencing the Surge: Report from a Large New York Radiation Oncology Department During the COVID-19 Pandemic. *Adv Radiat Oncol* 2020 doi: 10.1016/j.adro.2020.04.014 [published Online First: 2020/05/08]
16. Bundu I, Patel A, Mansaray A, et al. Surgery in the time of Ebola: how events impacted on a single surgical institution in Sierra Leone. *JR Army Med Corps* 2016;162(3):212-6. doi: 10.1136/jramc-2015-000582 [published Online First: 2016/01/21]
17. Burke JF, Chan AK, Mummaneni V, et al. Letter: The Coronavirus Disease 2019 Global Pandemic: A Neurosurgical Treatment Algorithm. *Neurosurgery* 2020;87(1):E50-E56. doi: 10.1093/neuros/nyaa116
18. Busin M, Yu AC, Ponzin D. Coping with COVID-19: An Italian Perspective on Corneal Surgery and Eye Banking in the Time of a Pandemic and Beyond. *Ophthalmology* 2020 doi: 10.1016/j.optha.2020.04.031 [published Online First: 2020/05/08]
19. Cai Y, Jiam NT, Wai KC, et al. Otolaryngology Resident Practices and Perceptions in the Initial Phase of the U.S. COVID-19 Pandemic. *Laryngoscope* 2020 doi: 10.1002/lary.28733 [published Online First: 2020/05/06]
20. Cakmak GK, Ozmen V. Sars-CoV-2 (COVID-19) Outbreak and Breast Cancer Surgery in Turkey. *Eur J Breast Health* 2020;16(2):83-85. doi: 10.5152/ejbh.2020.300320 [published Online First: 2020/04/15]
21. Carenzo L, Costantini E, Greco M, et al. Hospital surge capacity in a tertiary emergency referral centre during the COVID-19 outbreak in Italy. *Anaesthesia* 2020 doi: 10.1111/anae.15072 [published Online First: 2020/04/05]
22. Cenzato M, DiMeco F, Fontanella M, et al. Editorial. Neurosurgery in the storm of COVID-19: suggestions from the Lombardy region, Italy (ex malo bonum). *Journal of neurosurgery* 2020:1-2. doi: 10.3171/2020.3.JNS20960
23. Chan WM, Liu DTL, Chan PKS, et al. Precautions in ophthalmic practice in a hospital with a major acute SARS outbreak: an experience from Hong Kong. *Eye* 2006;20(3):283-89. doi: 10.1038/sj.eye.6701885
24. Chee VW, Khoo ML, Lee SF, et al. Infection control measures for operative procedures in severe acute respiratory syndrome-related patients. *Anesthesiology* 2004;100(6):1394-8. doi: 10.1097/0000542-200406000-00010 [published Online First: 2004/05/29]
25. Chew MH, Koh FH, Ng KH. A call to arms: a perspective of safe general surgery in Singapore during the COVID-19 pandemic. *Singapore Med J* 2020 doi: 10.11622/smedj.2020049 [published Online First: 2020/04/04]
26. Chisci E, Masciello F, Michelagnoli S. Creation of a vascular surgical hub responding to the COVID-19 emergency: The Italian USL Toscana Centro model. *J Vasc Surg* 2020 doi: 10.1016/j.jvs.2020.04.019 [published Online First: 2020/04/20]
27. Civantos FJ, Leibowitz JM, Arnold DJ, et al. Ethical surgical triage of patients with head and neck cancer during the COVID-19 pandemic. *Head Neck* 2020 doi: 10.1002/hed.26229 [published Online First: 2020/05/02]
28. D'Apolito R, Faraldi M, Ottaiano I, et al. Disruption of Arthroplasty Practice in an Orthopedic Center in Northern Italy During the Coronavirus Disease 2019 Pandemic. *J Arthroplasty* 2020 doi: 10.1016/j.arth.2020.04.057 [published Online First: 2020/05/07]
29. de Vries APJ, Alwayn IPJ, Hoek RAS, et al. Immediate impact of COVID-19 on transplant activity in the Netherlands. *Transpl Immunol* 2020:101304. doi: 10.1016/j.trim.2020.101304 [published Online First: 2020/05/07]

30. Ding BTK, Soh T, Tan BY, et al. Operating in a Pandemic: Lessons and Strategies from an Orthopaedic Unit at the Epicenter of COVID-19 in Singapore. *J Bone Joint Surg Am* 2020 doi: 10.2106/JBJS.20.00568 [published Online First: 2020/05/08]
31. Dominguez-Gil B, Coll E, Fernandez-Ruiz M, et al. COVID-19 in Spain: Transplantation in the midst of the pandemic. *Am J Transplant* 2020 doi: 10.1111/ajt.15983 [published Online First: 2020/05/03]
32. Doussot A, Heyd B, Lakkis Z. We Asked the Experts: How Do We Maintain Surgical Quality Standards for Enhanced Recovery Programs After Cancer Surgery During the COVID-19 Outbreak? *World J Surg* 2020 doi: 10.1007/s00268-020-05546-7 [published Online First: 2020/04/27]
33. Dowdell JE, Louie PK, Virk S, et al. Spine fellowship training reorganizing during a pandemic: perspectives from a tertiary orthopedic specialty center in the epicenter of outbreak. *Spine J* 2020 doi: 10.1016/j.spinee.2020.04.015 [published Online First: 2020/04/29]
34. Ducournau F, Arianni M, Awwad S, et al. COVID-19: Initial experience of an international group of hand surgeons. *Hand Surg Rehabil* 2020;39(3):159-66. doi: 10.1016/j.hansur.2020.04.001 [published Online First: 2020/04/13]
35. Eichberg DG, Shah AH, Luther EM, et al. Letter: Academic Neurosurgery Department Response to COVID-19 Pandemic: The University of Miami/Jackson Memorial Hospital Model. *Neurosurgery* 2020 doi: 10.1093/neuros/nyaa118 [published Online First: 2020/04/12]
36. Ficarra V, Mucciardi G, Giannarini G. Re: Riccardo Campi, Daniele Amparore, Umberto Capitanio, et al. Assessing the Burden of Urgent Nondeferrable Uro-oncologic Surgery to Guide Prioritisation Strategies During the COVID-19 Pandemic: Insights from Three Italian High-volume Referral Centres. *Eur Urol*. In press. <https://doi.org/10.1016/j.eururo.2020.03.054>. *Eur Urol* 2020 doi: 10.1016/j.eururo.2020.04.037 [published Online First: 2020/05/04]
37. Fontanella MM, De Maria L, Zanin L, et al. Neurosurgical Practice During the Severe Acute Respiratory Syndrome Coronavirus 2 (SARS-CoV-2) Pandemic: A Worldwide Survey. *World Neurosurg* 2020 doi: 10.1016/j.wneu.2020.04.204 [published Online First: 2020/05/08]
38. Fontanella MM, Saraceno G, Lei T, et al. Neurosurgical activity during COVID-19 pandemic: an expert opinion from China, South Korea, Italy, United States of America, Colombia and United Kingdom. *J Neurosurg Sci* 2020 doi: 10.23736/S0390-5616.20.04994-2 [published Online First: 2020/04/30]
39. Giorgi PD, Villa F, Gallazzi E, et al. The management of emergency spinal surgery during the COVID-19 pandemic in Italy. *Bone Joint J* 2020;xxx. doi: 10.1302/0301-620X.102B6.BJJ-2020-0537 [published Online First: 2020/04/24]
40. Givi B, Moore MG, Bewley AF, et al. Advanced head and neck surgery training during the COVID-19 pandemic. *Head Neck* 2020 doi: 10.1002/hed.26252 [published Online First: 2020/05/10]
41. Gomez-Barrena E, Rubio-Suarez JC, Fernandez-Baillo N, et al. Limiting spread of COVID-19 in an orthopaedic department—a perspective from Spain. *J Surg Case Rep* 2020;2020(4):rjaa095. doi: 10.1093/jscr/rjaa095 [published Online First: 2020/04/30]
42. Gouveia EMR, Pedro LM. Vascular surgery department adjustments in the era of the COVID-19 pandemic. *J Vasc Surg* 2020 doi: 10.1016/j.jvs.2020.04.017 [published Online First: 2020/04/20]
43. Guerci C, Maffioli A, Bondurri AA, et al. COVID-19: How can a department of general surgery survive in a pandemic? *Surgery* 2020;167(6):909-11. doi: 10.1016/j.surg.2020.03.012 [published Online First: 2020/04/18]

44. Gupta A, Arora V, Nair D, et al. Status and strategies for the management of head and neck cancer during COVID-19 pandemic: Indian scenario. *Head Neck* 2020 doi: 10.1002/hed.26227 [published Online First: 2020/05/02]
45. Haines CJ, Chu YW, Chung TK. The effect of Severe Acute Respiratory Syndrome on a hospital obstetrics and gynaecology service. *BJOG* 2003;110(7):643-5. doi: <http://dx.doi.org/10.1016/S1470-0328%2803%2903007-6> [published Online First: 2003/07/05]
46. British Columbia Ministry of Health. A Commitment to Surgical Renewal in BC. Canada, 2020.
47. Hemingway JF, Singh N, Starnes BW. Emerging practice patterns in vascular surgery during the COVID-19 pandemic. *J Vasc Surg* 2020 doi: 10.1016/j.jvs.2020.04.492 [published Online First: 2020/05/04]
48. Hormati A, Ghadir MR, Zamani F, et al. Preventive strategies used by GI physicians during the COVID-19 pandemic. *New Microbes New Infect* 2020;35:100676. doi: 10.1016/j.nmni.2020.100676 [published Online First: 2020/04/16]
49. Hu Y-J, Zhang J-M, Chen Z-P. Experiences of practicing surgical neuro-oncology during the COVID-19 pandemic. *Journal of neuro-oncology* 2020;148(1):199-200. doi: 10.1007/s11060-020-03489-6 [published Online First: 2020/04/10]
50. Jean WC, Ironside NT, Sack KD, et al. The impact of COVID-19 on neurosurgeons and the strategy for triaging non-emergent operations: a global neurosurgery study. *Acta Neurochir (Wien)* 2020;162(6):1229-40. doi: 10.1007/s00701-020-04342-5 [published Online First: 2020/04/22]
51. Kempa M, Gulaj M, Farkowski MM, et al. Electrotherapy and electrophysiology procedures during the coronavirus disease 2019 pandemic: an opinion of the Heart Rhythm Section of the Polish Cardiac Society (with an update). *Kardiol Pol* 2020;78(5):488-92. doi: 10.33963/KP.15338 [published Online First: 2020/05/06]
52. Kessler RA, Zimering J, Gilligan J, et al. Neurosurgical management of brain and spine tumors in the COVID-19 era: an institutional experience from the epicenter of the pandemic. *J Neurooncol* 2020 doi: 10.1007/s11060-020-03523-7 [published Online First: 2020/05/07]
53. Konda SR, Dankert JF, Merkow D, et al. COVID-19 Response in the Global Epicenter: Converting a New York City Level 1 Orthopedic Trauma Service into a Hybrid Orthopedic and Medicine COVID-19 Management Team. *J Orthop Trauma* 2020 doi: 10.1097/BOT.0000000000001792 [published Online First: 2020/05/02]
54. Kuo IC, Pellegrino F, Fornero P, et al. H1N1 pandemic and ophthalmology. *Ophthalmology* 2010;117(2):405. doi: 10.1016/j.ophtha.2009.11.035 [published Online First: 2010/02/10]
55. Lai THT, Tang EWH, Chau SKY, et al. Stepping up infection control measures in ophthalmology during the novel coronavirus outbreak: an experience from Hong Kong. *Graefes Arch Clin Exp Ophthalmol* 2020;258(5):1049-55. doi: 10.1007/s00417-020-04641-8 [published Online First: 2020/03/04]
56. Lancaster EM, Sosa JA, Sammann A, et al. Rapid Response of an Academic Surgical Department to the COVID-19 Pandemic: Implications for Patients, Surgeons, and the Community. *J Am Coll Surg* 2020;230(6):1064-73. doi: 10.1016/j.jamcollsurg.2020.04.007 [published Online First: 2020/04/13]
57. Langer PD, Bernardini FP. Oculofacial Plastic Surgery and the COVID-19 Pandemic: Current Reactions and Implications for the Future. *Ophthalmology* 2020 doi: 10.1016/j.ophtha.2020.04.035 [published Online First: 2020/04/30]

58. Lauterio A, De Carlis R, Belli L, et al. How to guarantee liver transplantation in the north of Italy during the COVID-19 pandemic: A sound transplant protection strategy. *Transpl Int* 2020 doi: 10.1111/tri.13633 [published Online First: 2020/04/30]
59. Lee AKF, Cho RHW, Lau EHL, et al. Mitigation of head and neck cancer service disruption during COVID-19 in Hong Kong through telehealth and multi-institutional collaboration. *Head Neck* 2020 doi: 10.1002/hed.26226 [published Online First: 2020/05/02]
60. Leong Tan GW, Chandrasekar S, Lo ZJ, et al. Early experience in the COVID-19 pandemic from a vascular surgery unit in a Singapore tertiary hospital. *J Vasc Surg* 2020 doi: 10.1016/j.jvs.2020.04.014 [published Online First: 2020/04/20]
61. Li Y, Yang N, Li X, et al. Strategies for prevention and control of the 2019 novel coronavirus disease in the department of kidney transplantation. *Transpl Int* 2020 doi: 10.1111/tri.13634 [published Online First: 2020/05/02]
62. Liebensteiner MC, Khosravi I, Hirschmann MT, et al. Massive cutback in orthopaedic healthcare services due to the COVID-19 pandemic. *Knee Surg Sports Traumatol Arthrosc* 2020;28(6):1705-11. doi: 10.1007/s00167-020-06032-2 [published Online First: 2020/05/02]
63. Liu EH, Koh KF, Chen FG. Outbreak of severe acute respiratory syndrome in Singapore and modifications in the anesthesia service. *Anesthesiology* 2004;100(6):1629-30. doi: 10.1097/0000542-200406000-00062 [published Online First: 2004/05/29]
64. Mak ST, Yuen HK. Oculoplastic surgery practice during the COVID-19 novel coronavirus pandemic: experience sharing from Hong Kong. *Orbit* 2020:1-3. doi: 10.1080/01676830.2020.1754435 [published Online First: 2020/04/17]
65. Marti C, Sanchez-Mendez JI. Neoadjuvant endocrine therapy for luminal breast cancer treatment: a first-choice alternative in times of crisis such as the COVID-19 pandemic. *Ecancermedicalscience* 2020;14:1027. doi: 10.3332/ecancer.2020.1027 [published Online First: 2020/05/06]
66. Maurizi G, Rendina EA. A High-Volume Thoracic Surgery Division into the Storm of the Covid-19 Pandemic. *Ann Thorac Surg* 2020 doi: 10.1016/j.athoracsur.2020.03.015 [published Online First: 2020/04/15]
67. McBride KE, Brown KGM, Fisher OM, et al. Impact of the COVID-19 pandemic on surgical services: early experiences at a nominated COVID-19 centre. *ANZ J Surg* 2020;90(5):663-65. doi: 10.1111/ans.15900 [published Online First: 2020/04/08]
68. McMillan T, Williamson K. Resuming non-urgent surgeries and allied health services, 2020.
69. Meneghini RM. Resource Reallocation during the COVID-19 Pandemic in a Suburban Hospital System: Implications for Outpatient Hip and Knee Arthroplasty. *J Arthroplasty* 2020 doi: 10.1016/j.arth.2020.04.051 [published Online First: 2020/05/08]
70. Meyer M, Prost S, Farah K, et al. Spine Surgical Procedures during Coronavirus Disease 2019 Pandemic: Is It Still Possible to Take Care of Patients? Results of an Observational Study in the First Month of Confinement. *Asian Spine J* 2020 doi: 10.31616/asj.2020.0197 [published Online First: 2020/05/10]
71. Morgan C, Ahluwalia AK, Aframian A, et al. The impact of the novel coronavirus on trauma and orthopaedics in the UK. *Br J Hosp Med (Lond)* 2020;81(4):1-6. doi: 10.12968/hmed.2020.0137 [published Online First: 2020/04/29]
72. Nair AG, Gandhi RA, Natarajan S. Effect of COVID-19 related lockdown on ophthalmic practice and patient care in India: Results of a survey. *Indian J Ophthalmol* 2020;68(5):725-30. doi: 10.4103/ijo.IJO\_797\_20 [published Online First: 2020/04/23]

73. Nassar AH, Zern NK, McIntyre LK, et al. Emergency Restructuring of a General Surgery Residency Program During the Coronavirus Disease 2019 Pandemic: The University of Washington Experience. *JAMA Surg* 2020 doi: 10.1001/jamasurg.2020.1219 [published Online First: 2020/04/07]
74. Park J, Yoo SY, Ko JH, et al. Infection Prevention Measures for Surgical Procedures during a Middle East Respiratory Syndrome Outbreak in a Tertiary Care Hospital in South Korea. *Sci Rep* 2020;10(1):325. doi: 10.1038/s41598-019-57216-x [published Online First: 2020/01/17]
75. Park JS, El-Sayed IH, Young VN, et al. Development of clinical care guidelines for faculty and residents in the era of COVID-19. *Head Neck* 2020 doi: 10.1002/hed.26225 [published Online First: 2020/04/30]
76. Patel RJ, Kejner A, McMullen C. Early institutional head and neck oncologic and microvascular surgery practice patterns across the United States during the SARS-CoV-2 (COVID19) pandemic. *Head Neck* 2020;42(6):1168-72. doi: 10.1002/hed.26189 [published Online First: 2020/04/25]
77. Patel ZM, Fernandez-Miranda J, Hwang PH, et al. Letter: Precautions for Endoscopic Transnasal Skull Base Surgery During the COVID-19 Pandemic. *Neurosurgery* 2020 doi: 10.1093/neuros/nyaa125 [published Online First: 2020/04/16]
78. Pelt CE, Campbell KL, Gililand JM, et al. The Rapid Response to the COVID-19 Pandemic by the Arthroplasty Divisions at Two Academic Referral Centers. *J Arthroplasty* 2020 doi: 10.1016/j.arth.2020.04.030 [published Online First: 2020/05/02]
79. Pittet D. Hopitaux Universitaire de Genève (HUG)- A model hospital for COVID-19 patient management, 2020.
80. Prachand VN, Milner R, Angelos P, et al. Medically Necessary, Time-Sensitive Procedures: Scoring System to Ethically and Efficiently Manage Resource Scarcity and Provider Risk During the COVID-19 Pandemic. *J Am Coll Surg* 2020 doi: 10.1016/j.jamcollsurg.2020.04.011 [published Online First: 2020/04/13]
81. Price KN, Thiede R, Shi VY, et al. Strategic dermatology clinical operations during the coronavirus disease 2019 (COVID-19) pandemic. *J Am Acad Dermatol* 2020;82(6):e207-e09. doi: 10.1016/j.jaad.2020.03.089 [published Online First: 2020/04/12]
82. Qadan M, Hong TS, Tanabe KK, et al. A Multidisciplinary Team Approach for Triage of Elective Cancer Surgery at the Massachusetts General Hospital During the Novel Coronavirus COVID-19 Outbreak. *Ann Surg* 2020 doi: 10.1097/SLA.0000000000003963 [published Online First: 2020/04/18]
83. Ralli M, Greco A, de Vincentiis M. The Effects of the COVID-19/SARS-CoV-2 Pandemic Outbreak on Otolaryngology Activity in Italy. *Ear Nose Throat J* 2020;145561320923893. doi: 10.1177/0145561320923893 [published Online First: 2020/04/30]
84. Rampinelli V, Mattavelli D, Gualtieri T, et al. Reshaping head and neck reconstruction policy during the COVID-19 pandemic peak: Experience in a front-line institution. *Auris Nasus Larynx* 2020 doi: 10.1016/j.anl.2020.04.008 [published Online First: 2020/05/05]
85. Randelli PS, Compagnoni R. Management of orthopaedic and traumatology patients during the Coronavirus disease (COVID-19) pandemic in northern Italy. *Knee Surg Sports Traumatol Arthrosc* 2020;28(6):1683-89. doi: 10.1007/s00167-020-06023-3 [published Online First: 2020/04/27]

86. Ricciardi L, Trungu S, Scerrati A, et al. Neurosurgery at the time of COVID-19: how this pandemic infectious disease is influencing neurosurgical activities and patient management. *J Neurosurg Sci* 2020 doi: 10.23736/S0390-5616.20.04976-0 [published Online First: 2020/04/30]
87. Ross SW, Lauer CW, Miles WS, et al. Maximizing the Calm before the Storm: Tiered Surgical Response Plan for Novel Coronavirus (COVID-19). *J Am Coll Surg* 2020;230(6):1080-91 e3. doi: 10.1016/j.jamcollsurg.2020.03.019 [published Online First: 2020/04/03]
88. Rubin GA, Biviano A, Dizon J, et al. Performance of electrophysiology procedures at an academic medical center amidst the 2020 coronavirus (COVID-19) pandemic. *J Cardiovasc Electrophysiol* 2020 doi: 10.1111/jce.14493 [published Online First: 2020/04/14]
89. Rubin GA, Wan EY, Saluja D, et al. Restructuring Electrophysiology During the COVID-19 Pandemic: A Practical Guide from a New York City Hospital Network. *Crit Pathw Cardiol* 2020 doi: 10.1097/HPC.000000000000225 [published Online First: 2020/04/24]
90. Salenger R, Etchill EW, Ad N, et al. The Surge after the Surge: Cardiac Surgery post-COVID-19. *Ann Thorac Surg* 2020 doi: 10.1016/j.athoracsur.2020.04.018 [published Online First: 2020/05/08]
91. Sarpong NO, Forrester LA, Levine WN. What's Important: Redeployment of the Orthopaedic Surgeon During the COVID-19 Pandemic: Perspectives from the Trenches. *J Bone Joint Surg Am* 2020 doi: 10.2106/JBJS.20.00574 [published Online First: 2020/04/15]
92. Schull MJ, Stukel TA, Vermeulen MJ, et al. Effect of widespread restrictions on the use of hospital services during an outbreak of severe acute respiratory syndrome. *Canadian Medical Association Journal* 2007;176(13):1827-32. doi: 10.1503/cmaj.061174
93. Schwarzkopf R, Maher NA, Slover JD, et al. The Response of an Orthopedic Department and Specialty Hospital at the Epicenter of a Pandemic: The NYU Langone Health Experience. *J Arthroplasty* 2020 doi: 10.1016/j.arth.2020.04.041 [published Online First: 2020/05/08]
94. Scullen T, Mathkour M, Maulucci CM, et al. Impact of the COVID-19 Pandemic on Neurosurgical Residency Training in New Orleans. *World Neurosurg* 2020 doi: 10.1016/j.wneu.2020.04.208 [published Online First: 2020/05/08]
95. Seese L, Aranda-Michel E, Sultan I, et al. Programmatic Responses to the Coronavirus Pandemic: A Survey of 502 Cardiac Surgeons. *Ann Thorac Surg* 2020 doi: 10.1016/j.athoracsur.2020.04.014 [published Online First: 2020/05/04]
96. Sethi A, Swaminath A, Latorre M, et al. Donning a New Approach to the Practice of Gastroenterology: Perspectives From the COVID-19 Pandemic Epicenter. *Clin Gastroenterol Hepatol* 2020 doi: 10.1016/j.cgh.2020.04.032 [published Online First: 2020/04/25]
97. Shen Y, Cui Y, Li N, et al. Emergency Responses to Covid-19 Outbreak: Experiences and Lessons from a General Hospital in Nanjing, China. *Cardiovasc Intervent Radiol* 2020;43(6):810-19. doi: 10.1007/s00270-020-02474-w [published Online First: 2020/04/29]
98. Shih KC, Wong JKW, Lai JSM, et al. The case for continuing elective cataract surgery during the COVID-19 pandemic. *J Cataract Refract Surg* 2020 doi: 10.1097/j.jcrs.000000000000225 [published Online First: 2020/05/06]
99. Shokri T, Lighthall JG. Telemedicine in the Era of the COVID-19 Pandemic: Implications in Facial Plastic Surgery. *Facial Plast Surg Aesthet Med* 2020;22(3):155-56. doi: 10.1089/fpsam.2020.0163 [published Online First: 2020/04/18]
100. Sobel D, Gn M, O'Rourke TK, Jr., et al. Personal Protective Equipment for Common Urologic Procedures Before and During the United States COVID-19 Pandemic: A Single Institution Study. *Urology* 2020 doi: 10.1016/j.urology.2020.04.083 [published Online First: 2020/05/08]

101. Sun Y, Mao Y. Editorial. Response to COVID-19 in Chinese neurosurgery and beyond. *Journal of neurosurgery* 2020;1-2. doi: 10.3171/2020.3.JNS20929
102. National Clinical Programme in Surgery. Surgical Patient Flow During COVID-19 Pandemic, 2020.
103. Tan TK. How severe acute respiratory syndrome (SARS) affected the department of anaesthesia at Singapore General Hospital. *Anaesth Intensive Care* 2004;32(3):394-400. doi: 10.1177/0310057x0403200316 [published Online First: 2004/07/22]
104. Tan YQ, Wu QH, Chiong E. Preserving Operational Capability While Building Capacity During the COVID-19 Pandemic: A Tertiary Urology Centre's Experience. *Urology* 2020 doi: 10.1016/j.urology.2020.04.079 [published Online First: 2020/05/04]
105. Tan YT, Wang JW, Zhao K, et al. Preliminary Recommendations for Surgical Practice of Neurosurgery Department in the Central Epidemic Area of 2019 Coronavirus Infection. *Curr Med Sci* 2020;40(2):281-84. doi: 10.1007/s11596-020-2173-5 [published Online First: 2020/03/29]
106. Tay K, Kamarul T, Lok WY, et al. COVID-19 in Singapore and Malaysia: Rising to the Challenges of Orthopaedic Practice in an Evolving Pandemic. *Malays Orthop J* 2020;14(2) doi: 10.5704/MOJ.2007.001 [published Online First: 2020/04/22]
107. Tay KJD, Lee YHD. Trauma and orthopaedics in the COVID-19 pandemic: breaking every wave. *Singapore Med J* 2020 doi: 10.11622/smedj.2020063 [published Online First: 2020/04/22]
108. Thaler M, Khosravi I, Hirschmann MT, et al. Disruption of joint arthroplasty services in Europe during the COVID-19 pandemic: an online survey within the European Hip Society (EHS) and the European Knee Associates (EKA). *Knee Surg Sports Traumatol Arthrosc* 2020;28(6):1712-19. doi: 10.1007/s00167-020-06033-1 [published Online First: 2020/05/04]
109. Tolone S, Gambardella C, Bruscianno L, et al. Telephonic triage before surgical ward admission and telemedicine during COVID-19 outbreak in Italy. Effective and easy procedures to reduce in-hospital positivity. *Int J Surg* 2020;78:123-25. doi: 10.1016/j.ijsu.2020.04.060 [published Online First: 2020/05/04]
110. Too CW, Wen DW, Patel A, et al. Interventional Radiology Procedures for COVID-19 Patients: How we Do it. *Cardiovasc Intervent Radiol* 2020;43(6):827-36. doi: 10.1007/s00270-020-02483-9 [published Online First: 2020/04/29]
111. Topf MC, Shenson JA, Holsinger FC, et al. Framework for prioritizing head and neck surgery during the COVID-19 pandemic. *Head Neck* 2020;42(6):1159-67. doi: 10.1002/hed.26184 [published Online First: 2020/04/17]
112. Tsui KL, Li SK, Li MC, et al. Preparedness of the cardiac catheterization laboratory for severe acute respiratory syndrome (SARS) and other epidemics. *J Invasive Cardiol* 2005;17(3):149-52. [published Online First: 2005/05/04]
113. Tzeng C-WD, Tran Cao HS, Roland CL, et al. Surgical decision-making and prioritization for cancer patients at the onset of the COVID-19 pandemic: A multidisciplinary approach. *Surgical Oncology* 2020;34:182-85. doi: 10.1016/j.suronc.2020.04.029
114. Unal EU, Mavioglu HL, Iscan HZ. Vascular surgery in the COVID-19 pandemic. *J Vasc Surg* 2020 doi: 10.1016/j.jvs.2020.04.480 [published Online First: 2020/04/29]
115. Vaccaro AR, Getz CL, Cohen BE, et al. Practice Management During the COVID-19 Pandemic. *J Am Acad Orthop Surg* 2020;28(11):464-70. doi: 10.5435/JAAOS-D-20-00379 [published Online First: 2020/04/15]



116. Valenza F, Papagni G, Marchiano A, et al. Response of a comprehensive cancer center to the COVID-19 pandemic: the experience of the Fondazione IRCCS-Istituto Nazionale dei Tumori di Milano. *Tumori* 2020;300891620923790. doi: 10.1177/0300891620923790 [published Online First: 2020/05/05]
117. van de Haar J, Hoes LR, Coles CE, et al. Caring for patients with cancer in the COVID-19 era. *Nat Med* 2020;26(5):665-71. doi: 10.1038/s41591-020-0874-8 [published Online First: 2020/05/15]
118. Vicini E, Galimberti V, Naninato P, et al. COVID-19: The European institute of oncology as a "hub" centre for breast cancer surgery during the pandemic in Milan (Lombardy region, northern Italy) - A screenshot of the first month. *Eur J Surg Oncol* 2020 doi: 10.1016/j.ejso.2020.04.026 [published Online First: 2020/05/04]
119. Vlantis AC, Tsang RK, Wong DK, et al. The impact of severe acute respiratory syndrome on otorhinolaryngological services at the Prince of Wales Hospital in Hong Kong. *Laryngoscope* 2004;114(1):171-4. doi: 10.1097/00005537-200401000-00032 [published Online First: 2004/01/08]
120. Walker JP. Resuming Elective Surgery at UTMB Predicated on Patient and Staff Well-Being, 2020.
121. Wan IYP, Wat KHY, Ng CSH, et al. Evaluation of the emotional status of patients on a waiting list for thoracic surgery during the outbreak of Severe Acute Respiratory Syndrome(SARS). *Stress and Health* 2004;20(4):209-12. doi: 10.1002/smi.1013
122. Wang X, Wang Z, Yao C, et al. Management of ophthalmic perioperative period during 2019 novel coronavirus disease outbreak. *Zhonghua Shiyan Yanke Zazhi/Chinese Journal of Experimental Ophthalmology* 2020;38(3):200-03. doi: <http://dx.doi.org/10.3760/cma.j.issn115989-20200224-00100>
123. Wasser LM, Assayag E, Tsessler M, et al. Response of ophthalmologists in Israel to the novel coronavirus (2019-nCoV) outbreak. *Graefes Arch Clin Exp Ophthalmol* 2020 doi: 10.1007/s00417-020-04694-9 [published Online First: 2020/04/30]
124. Williams AM, Kalra G, Commiskey PW, et al. Ophthalmology Practice During the Coronavirus Disease 2019 Pandemic: The University of Pittsburgh Experience in Promoting Clinic Safety and Embracing Video Visits. *Ophthalmol Ther* 2020:1-9. doi: 10.1007/s40123-020-00255-9 [published Online First: 2020/05/08]
125. Wong J, Goh QY, Tan Z, et al. Preparing for a COVID-19 pandemic: a review of operating room outbreak response measures in a large tertiary hospital in Singapore. *Canadian Journal of Anesthesia/Journal canadien d'anesthésie* 2020;67(6):732-45. doi: 10.1007/s12630-020-01620-9
126. Wu V, Noel CW, Forner D, et al. Considerations for head and neck oncology practices during the coronavirus disease 2019 (COVID-19) pandemic: Wuhan and Toronto experience. *Head Neck* 2020;42(6):1202-08. doi: 10.1002/hed.26205 [published Online First: 2020/04/28]
127. Zangrillo A, Beretta L, Silvani P, et al. Fast reshaping of intensive care unit facilities in a large metropolitan hospital in Milan, Italy: facing the COVID-19 pandemic emergency. *Crit Care Resusc* 2020 [published Online First: 2020/04/02]
128. Zarzaur BL, Stahl CC, Greenberg JA, et al. Blueprint for Restructuring a Department of Surgery in Concert With the Health Care System During a Pandemic: The University of Wisconsin Experience. *JAMA Surg* 2020 doi: 10.1001/jamasurg.2020.1386 [published Online First: 2020/04/15]

129. Zeng L, Su T, Huang L. Strategic plan for management in oral and maxillofacial surgery during COVID-19 epidemic. *Oral Oncol* 2020;105:104715. doi: 10.1016/j.oraloncology.2020.104715 [published Online First: 2020/04/20]
130. Zhen L, Lin T, Zhao ML, et al. [Management strategy for the resumption of regular diagnosis and treatment in gastrointestinal surgery department during the outbreak of coronavirus disease 2019 (COVID-19)]. *Zhonghua Wei Chang Wai Ke Za Zhi* 2020;23(4):321-26. doi: 10.3760/cma.j.issn.1671-0274.2020-0316-00146 [published Online First: 2020/04/21]
131. Zizzo M, Bollino R, Castro Ruiz C, et al. Surgical management of suspected or confirmed SARS-CoV-2 (COVID-19)-positive patients: a model stemming from the experience at Level III Hospital in Emilia-Romagna, Italy. *Eur J Trauma Emerg Surg* 2020 doi: 10.1007/s00068-020-01377-2 [published Online First: 2020/04/30]
132. Zoia C, Bongetta D, Veiceschi P, et al. Neurosurgery during the COVID-19 pandemic: update from Lombardy, northern Italy. *Acta Neurochir (Wien)* 2020;162(6):1221-22. doi: 10.1007/s00701-020-04305-w [published Online First: 2020/03/31]
